# Supplementary material for: Clinical outcomes and predictive factors of immunotherapy efficacy in non-small cell lung cancer brain metastases: A comparative study
Source: Research Square preprint supplement (doi:10.21203/rs.3.rs-7676603/v1), 2025-10-15
Supplement: Supplementary file 1 [file b3895bcfde2f89c5da0c7f7c.docx]

Supplementary Table S1 Standardized mean differences of baseline covariates before and after propensity score matching

| Variable | Type | SMD before PSM | SMD after PSM |
| --- | --- | --- | --- |
| Distance | Distance | 3.50779908 | 0.0942365 |
| Sex | Binary* | -0.9390244 | 0 |
| female | Binary | 0.24186423 | -0.0163934 |
| male | Binary | 0.69716016 | 0.01639344 |
| Age | Binary | -0.9390244 | 0 |
| <65 | Binary | 0.50964451 | -0.0327869 |
| >=65 | Binary | 0.42937988 | 0.03278689 |
| ECOG: | Binary | -0.9390244 | 0 |
| >=2 | Binary | 0.22441985 | 0.03278689 |
| 0or1 | Binary | 0.71460454 | -0.0327869 |
| Pathological subtype | Binary | -0.9390244 | 0 |
| nonsquamous | Binary | 0.76078887 | -0.0327869 |
| squamous | Binary | 0.17823552 | 0.03278689 |
| Line of immunotherapy | Binary | -0.9390244 | 0 |
| first | Binary | 0.4388422 | -0.0163934 |
| non-first | Binary | 0.50018219 | 0.01639344 |
| Radiotherapy | Binary | -0.9390244 | 0 |
| no | Binary | 0.49296304 | 0 |
| yes | Binary | 0.44606135 | 0 |
| EGFR mutation | Binary | -0.9390244 | 0 |
| no | Binary | 0.73756006 | 0.01639344 |
| yes | Binary | 0.20146433 | -0.0163934 |
| Number of brain metastases | Binary | -0.9390244 | 0 |
| multiple | Binary | 0.3912687 | 0.01639344 |
| oligo | Binary | 0.54775569 | -0.0163934 |

SMD, Standardized mean differences; ECOG, Eastern Cooperative Oncology Group Performance Status; * indicates whether the variable is dichotomous

Supplementary Table S2 Baseline characteristics of matched patients with brain metastases receiving immunotherapy or chemotherapy alone

| Characteristics | Level | Total Count (%) | Immunotherapy | Chemotherapy | P value |
| --- | --- | --- | --- | --- | --- |
| Sex | Female | 51 (41.8%) | 26 (42.6%) | 25 (41.0%) | 1.0000 |
|  | Male | 71 (58.2%) | 35 (57.4%) | 36 (59.0%) |  |
| Age | <65 | 80 (65.6%) | 41 (67.2%) | 39 (63.9%) | 0.8489 |
|  | >=65 | 42 (34.4%) | 20 (32.8%) | 22 (36.1%) |  |
| Smoking history | No | 60 (49.2%) | 31 (50.8%) | 29 (47.5%) | 0.8563 |
|  | Yes | 62 (50.8%) | 30 (49.2%) | 32 (52.5%) |  |
| ECOG | 0or1 | 104 (85.2%) | 53 (86.9%) | 51 (83.6%) | 0.7985 |
|  | >=2 | 18 (14.8%) | 8 (13.1%) | 10 (16.4%) |  |
| Pathological subtype | Nonsquamous | 108 (88.5%) | 55 (90.2%) | 53 (86.9%) | 0.7764 |
|  | Squamous | 14 (11.5%) | 6 (9.8%) | 8 (13.1%) |  |
| Line of immunotherapy | First | 53 (43.4%) | 27 (44.3%) | 26 (42.6%) | 1.0000 |
|  | Non-first | 69 (56.6%) | 34 (55.7%) | 35 (57.4%) |  |
| EGFR mutation | No | 79 (64.8%) | 39 (63.9%) | 40 (65.6%) | 1.0000 |
|  | Yes | 43 (35.2%) | 22 (36.1%) | 21 (34.4%) |  |
| Neurological symptom (%) | No | 80 (65.6%) | 40 (65.6%) | 40 (65.6%) | 1.0000 |
|  | Yes | 42 (34.4%) | 21 (34.4%) | 21 (34.4%) |  |
| Number of brain metastases (%) | Multiple | 63 (51.6%) | 31 (50.8%) | 32 (52.5%) | 1.0000 |
|  | Oligo | 59 (48.4%) | 30 (49.2%) | 29 (47.5%) |  |
| Leptomeningeal metastases (%) | No | 113 (92.6%) | 54 (88.5%) | 59 (96.7%) | 0.1632 |
|  | Yes | 9 (7.4%) | 7 (11.5%) | 2 (3.3%) |  |
| Radiotherapy (%) | No | 62 (50.8%) | 31 (50.8%) | 31 (50.8%) | 1.0000 |
|  | Yes | 60 (49.2%) | 30 (49.2%) | 30 (49.2%) |  |
| Radiotherapy modality (%) | No | 62 (50.8%) | 31 (50.8%) | 31 (50.8%) | 0.4342 |
|  | SRT | 29 (23.8%) | 12 (19.7%) | 17 (27.9%) |  |
|  | WBRT | 31 (25.4%) | 18 (29.5%) | 13 (21.3%) |  |
| Radiotherapy timing (%) | No | 62 (50.8%) | 31 (50.8%) | 31 (50.8%) | 0.7458 |
|  | Before | 28 (23.0%) | 16 (26.2%) | 12 (19.7%) |  |
|  | Concurrent | 15 (12.3%) | 6 (9.8%) | 9 (14.8%) |  |
|  | Palliative | 17 (13.9%) | 8 (13.1%) | 9 (14.8%) |  |

ECOG, Eastern Cooperative Oncology Group Performance Status. SRT, Stereotactic Radiotherapy; WBRT, Whole-Brain Radiotherapy

Supplementary Table S3 Baseline characteristics of chemotherapy cohort

| Characteristics | Level | Overall | Intracranial Response | | P value |
| --- | --- | --- | --- | --- | --- |
|  |  |  | Yes | No |  |
| Number |  | 85 | 57 (71.3) | 23 (28.7) |  |
| Sex (%) | Female | 39 (45.9) | 29 (50.9) | 7 (30.4) | 0.157 |
|  | Male | 46 (54.1) | 28 (49.1) | 16 (69.6) |  |
| Age (%) | <65 | 64 (75.3) | 43 (75.4) | 18 (78.3) | 1.000 |
|  | >=65 | 21 (24.7) | 14 (24.6) | 5 (21.7) |  |
| Smoking history (%) | No | 47 (55.3) | 33 (57.9) | 10 (43.5) | 0.356 |
|  | Yes | 38 (44.7) | 24 (42.1) | 13 (56.5) |  |
| ECOG (%) | 0 or1 | 8 (9.4) | 6 (10.5) | 2 (8.7) | 1.000 |
|  | >=2 | 77 (90.6) | 51 (89.5) | 21 (91.3) |  |
| Pathological subtype (%) | Non-squamous | 79 (92.9) | 54 (94.7) | 22 (95.7) | 1.000 |
|  | Squamous | 6 (7.1) | 3 (5.3) | 1 (4.3) |  |
| EGFR mutation | No | 45 (52.9) | 26 (45.6) | 16 (69.6) | 0.090 |
|  | Yes | 40 (47.1) | 31 (54.4) | 7 (30.4) |  |
| Line of immunotherapy | First | 41 (48.2) | 24 (42.1) | 15 (65.2) | 0.104 |
|  | Non-first | 44 (51.8) | 33 (57.9) | 8 (34.8) |  |
| Neurological symptom (%) | No | 57 (67.1) | 40 (70.2) | 14 (60.9) | 0.589 |
|  | Yes | 28 (32.9) | 17 (29.8) | 9 (39.1) |  |
| Number of brain metastases (%) | Multiple | 52 (61.2) | 36 (63.2) | 13 (56.5) | 0.766 |
|  | Oligo | 33 (38.8) | 21 (36.8) | 10 (43.5) |  |
| Leptomeningeal metastases (%) | No | 74 (87.1) | 49 (86.0) | 21 (91.3) | 0.779 |
|  | Yes | 11 (12.9) | 8 (14.0) | 2 (8.7) |  |
| Radiotherapy (%) | No | 43 (50.6) | 31 (54.4) | 8 (34.8) | 0.180 |
|  | Yes | 42 (49.4) | 26 (45.6) | 15 (65.2) |  |
| Radiotherapy modality (%) | No | 43 (50.6) | 31 (54.4) | 8 (34.8) | 0.040 |
|  | SRT | 13 (15.3) | 5 (8.8) | 7 (30.4) |  |
|  | WBRT | 29 (34.1) | 21 (36.8) | 8 (34.8) |  |
| Radiotherapy timing (%) | No | 20 (23.5) | 10 (17.5) | 10 (43.5) | 0.114 |
|  | Before | 9 (10.6) | 6 (10.5) | 2 (8.7) |  |
|  | Concurrent | 43 (50.6) | 31 (54.4) | 8 (34.8) |  |
|  | Palliative | 13 (15.3) | 10 (17.5) | 3 (13.0) |  |

ECOG, Eastern Cooperative Oncology Group Performance Status. SRT, Stereotactic Radiotherapy; WBRT, Whole-Brain Radiotherapy

Figure S1 Univariate logistic regression analysis of clinical factors associated with intracranial objective response in NSCLC patients with brain metastases receiving chemotherapy alone. The blue dots represent the odds ratios (ORs) for each variable, and the blue horizontal lines indicate the corresponding 95% confidence intervals (CIs). SRT, Stereotactic Radiotherapy; WBRT, Whole-Brain Radiotherapy.

Figure S2 Univariate logistic regression analysis of clinical factors associated with extracranial objective response in NSCLC patients with brain metastases receiving chemotherapy alone. The blue dots represent the odds ratios (ORs) for each variable, and the blue horizontal lines indicate the corresponding 95% confidence intervals (CIs). The odds ratio for ECOG performance status was not estimable due to the absence of events in one or more subgroups. SRT, Stereotactic Radiotherapy; WBRT, Whole-Brain Radiotherapy.

Figure S3 Univariate cox regression analysis of prognostic factors for overall survival in NSCLC patients with brain metastases receiving chemotherapy alone. The blue dots represent the hazard ratios (HRs) for each variable, and the blue horizontal lines indicate the corresponding 95% confidence intervals (CIs). SRT, Stereotactic Radiotherapy; WBRT, Whole-Brain Radiotherapy.

Figure S4 Univariate cox regression analysis of prognostic factors for intracranial progression-free survival in NSCLC patients with brain metastases receiving chemotherapy alone. The blue dots represent the hazard ratios (HRs) for each variable, and the blue horizontal lines indicate the corresponding 95% confidence intervals (CIs). SRT, Stereotactic Radiotherapy; WBRT, Whole-Brain Radiotherapy.

Figure S5 Univariate cox regression analysis of prognostic factors for extracranial progression-free survival in NSCLC patients with brain metastases receiving chemotherapy alone. The blue dots represent the hazard ratios (HRs) for each variable, and the blue horizontal lines indicate the corresponding 95% confidence intervals (CIs). SRT, Stereotactic Radiotherapy; WBRT, Whole-Brain Radiotherapy.
